# Supplementary material for: Comparative transcriptomics of 5 high-altitude vertebrates and their low-altitude relatives
Source: PubMed Central journal article supplement (PMC5729692; doi:10.1093/gigascience/gix105), 2017-11-15
Supplement: gix105_giga-d-17-00037_original-submission.pdf [file gix105_giga-d-17-00037_original-submission.pdf]

# GigaScience

## Comparative transcriptomics of five high-altitude vertebrates and their low-altitude relatives

--Manuscript Draft--

|                             |                                                                                                                                                                                                                                                                                                                                                                                                                                                                                                                                                                                          |                   |
|-----------------------------|------------------------------------------------------------------------------------------------------------------------------------------------------------------------------------------------------------------------------------------------------------------------------------------------------------------------------------------------------------------------------------------------------------------------------------------------------------------------------------------------------------------------------------------------------------------------------------------|-------------------|
| <b>Manuscript Number:</b>   | GIGA-D-17-00037                                                                                                                                                                                                                                                                                                                                                                                                                                                                                                                                                                          |                   |
| <b>Full Title:</b>          | Comparative transcriptomics of five high-altitude vertebrates and their low-altitude relatives                                                                                                                                                                                                                                                                                                                                                                                                                                                                                           |                   |
| <b>Article Type:</b>        | Data Note                                                                                                                                                                                                                                                                                                                                                                                                                                                                                                                                                                                |                   |
| <b>Funding Information:</b> | National High Technology Research and Development Program of China (863 Program) (2013AA102502)                                                                                                                                                                                                                                                                                                                                                                                                                                                                                          | Prof. Mingzhou Li |
|                             | National Natural Science Foundation of China (31402046)                                                                                                                                                                                                                                                                                                                                                                                                                                                                                                                                  | Dr Qianzi Tang    |
|                             | National Natural Science Foundation of China (31522055)                                                                                                                                                                                                                                                                                                                                                                                                                                                                                                                                  | Prof. Mingzhou Li |
|                             | National Natural Science Foundation of China (31601918)                                                                                                                                                                                                                                                                                                                                                                                                                                                                                                                                  | Dr Jideng Ma      |
|                             | National Natural Science Foundation of China (31530073)                                                                                                                                                                                                                                                                                                                                                                                                                                                                                                                                  | Prof Xuewei Li    |
|                             | National Natural Science Foundation of China (31472081)                                                                                                                                                                                                                                                                                                                                                                                                                                                                                                                                  | Prof. Mingzhou Li |
|                             | Science & Technology Support Program of Sichuan (2016NYZ0042)                                                                                                                                                                                                                                                                                                                                                                                                                                                                                                                            | Dr Yiren Gu       |
|                             | Youth Science Fund of Sichuan (2017JQ0011)                                                                                                                                                                                                                                                                                                                                                                                                                                                                                                                                               | Dr Yiren Gu       |
|                             | China Postdoctoral Science Foundation (2015M572486)                                                                                                                                                                                                                                                                                                                                                                                                                                                                                                                                      | Dr Qianzi Tang    |
|                             | China Agriculture Research System (CARS-36)                                                                                                                                                                                                                                                                                                                                                                                                                                                                                                                                              | Dr Yiren Gu       |
|                             | Program for Innovative Research Team of Sichuan Province (2015TD0012)                                                                                                                                                                                                                                                                                                                                                                                                                                                                                                                    | Prof. Mingzhou Li |
|                             | Program for Pig Industry Technology System Innovation Team of Sichuan Province (SCCXTD-005)                                                                                                                                                                                                                                                                                                                                                                                                                                                                                              | Dr Yiren Gu       |
|                             | Project of Sichuan Education Department (15ZA0008)                                                                                                                                                                                                                                                                                                                                                                                                                                                                                                                                       | Dr Xun Wang       |
|                             | Project of Sichuan Education Department (15ZA0003)                                                                                                                                                                                                                                                                                                                                                                                                                                                                                                                                       | Dr Miaomiao Mai   |
|                             | Project of Sichuan Education Department (16ZA0025)                                                                                                                                                                                                                                                                                                                                                                                                                                                                                                                                       | Dr Jideng Ma      |
|                             | Project of Sichuan Education Department (16ZB0037)                                                                                                                                                                                                                                                                                                                                                                                                                                                                                                                                       | Dr An'an Jiang    |
|                             | National Program for Support of Top-notch Young Professionals                                                                                                                                                                                                                                                                                                                                                                                                                                                                                                                            | Prof. Mingzhou Li |
|                             | Young Scholars of the Yangtze River                                                                                                                                                                                                                                                                                                                                                                                                                                                                                                                                                      | Prof. Mingzhou Li |
| <b>Abstract:</b>            | <p>Background: Species living at high altitude are subject to strong selective pressures due to inhospitable environments (e.g., hypoxia, low temperature, high solar radiation, and lack of biological production), making these species valuable models for comparative analyses of local adaptation. Studies that examined high-altitude adaptation identified a vast array of rapidly evolving genes that characterize the dramatic phenotypic changes in high-altitude animals. However, how high-altitude environment shapes gene expression programs remains largely unknown.</p> |                   |

|                                                      |                                                                                                                                                                                                                                                                                                                                                                                                                                                                                                                                                                                                                                                                                                                                                                                                                                                                                                                                                                                                                                                                                                                                                                                                                                                                                                                                                                                                                                                                     |
|------------------------------------------------------|---------------------------------------------------------------------------------------------------------------------------------------------------------------------------------------------------------------------------------------------------------------------------------------------------------------------------------------------------------------------------------------------------------------------------------------------------------------------------------------------------------------------------------------------------------------------------------------------------------------------------------------------------------------------------------------------------------------------------------------------------------------------------------------------------------------------------------------------------------------------------------------------------------------------------------------------------------------------------------------------------------------------------------------------------------------------------------------------------------------------------------------------------------------------------------------------------------------------------------------------------------------------------------------------------------------------------------------------------------------------------------------------------------------------------------------------------------------------|
|                                                      | <p>Findings: We generated a total of 910 Gb high-quality RNA-seq data for 180 samples derived from six tissues of five agriculturally important high-altitude vertebrates (Tibetan chicken, Tibetan pig, Tibetan sheep, Tibetan goat and yak), and their cross-fertile relatives living in geographically neighboring low-altitude regions. Of these, ~75% reads could be aligned to their respective reference genomes, and on average ~70% of annotated protein coding genes in each organism showed FPKM expression values greater than 0.1. We observed a general concordance in topological relationships between the nucleotide alignments and gene expression-based trees. Tissue and species accounted for markedly more variance than altitude based on either the expression or the alternative splicing patterns. Cross-species clustering analyses showed a tissue-dominated pattern of gene expression, and a species-dominated pattern for alternative splicing. We also identified numerous differentially expressed genes were potentially involved in phenotypic divergence shaped by high-altitude adaptation.</p> <p>Conclusions: This data serves as a valuable resource for examining the convergence and divergence of gene expression changes between species as they adapt or acclimatize to high-altitude environments.</p> <p>Keywords: high-altitude vertebrates, comparative transcriptomics, gene expression, alternative splicing</p> |
| <b>Corresponding Author:</b>                         | Mingzhou Li, Ph.D.<br>Sichuan Agricultural University<br>Chengdu, Sichuan CHINA                                                                                                                                                                                                                                                                                                                                                                                                                                                                                                                                                                                                                                                                                                                                                                                                                                                                                                                                                                                                                                                                                                                                                                                                                                                                                                                                                                                     |
| <b>Corresponding Author Secondary Information:</b>   |                                                                                                                                                                                                                                                                                                                                                                                                                                                                                                                                                                                                                                                                                                                                                                                                                                                                                                                                                                                                                                                                                                                                                                                                                                                                                                                                                                                                                                                                     |
| <b>Corresponding Author's Institution:</b>           | Sichuan Agricultural University                                                                                                                                                                                                                                                                                                                                                                                                                                                                                                                                                                                                                                                                                                                                                                                                                                                                                                                                                                                                                                                                                                                                                                                                                                                                                                                                                                                                                                     |
| <b>Corresponding Author's Secondary Institution:</b> |                                                                                                                                                                                                                                                                                                                                                                                                                                                                                                                                                                                                                                                                                                                                                                                                                                                                                                                                                                                                                                                                                                                                                                                                                                                                                                                                                                                                                                                                     |
| <b>First Author:</b>                                 | Qianzi Tang                                                                                                                                                                                                                                                                                                                                                                                                                                                                                                                                                                                                                                                                                                                                                                                                                                                                                                                                                                                                                                                                                                                                                                                                                                                                                                                                                                                                                                                         |
| <b>First Author Secondary Information:</b>           |                                                                                                                                                                                                                                                                                                                                                                                                                                                                                                                                                                                                                                                                                                                                                                                                                                                                                                                                                                                                                                                                                                                                                                                                                                                                                                                                                                                                                                                                     |
| <b>Order of Authors:</b>                             | <p>Qianzi Tang</p> <p>Yiren Gu</p> <p>Xuming Zhou</p> <p>Long Jin</p> <p>Jiuqiang Guan</p> <p>Rui Liu</p> <p>Jing Li</p> <p>Keren Long</p> <p>Shilin Tian</p> <p>Tiandong Che</p> <p>Silu Hu</p> <p>Yan Liang</p> <p>Xuemei Yang</p> <p>Xuan Tao</p> <p>Zhijun Zhong</p> <p>Guosong Wang</p> <p>Xiaohui Chen</p> <p>Diyan Li</p> <p>Jideng Ma</p>                                                                                                                                                                                                                                                                                                                                                                                                                                                                                                                                                                                                                                                                                                                                                                                                                                                                                                                                                                                                                                                                                                                   |

|                                                                                                                                                                                                                                                                                                                                                                                                                                                                                                                                     |                                                                                                                                                                                                                    |
|-------------------------------------------------------------------------------------------------------------------------------------------------------------------------------------------------------------------------------------------------------------------------------------------------------------------------------------------------------------------------------------------------------------------------------------------------------------------------------------------------------------------------------------|--------------------------------------------------------------------------------------------------------------------------------------------------------------------------------------------------------------------|
|                                                                                                                                                                                                                                                                                                                                                                                                                                                                                                                                     | Xun Wang                                                                                                                                                                                                           |
|                                                                                                                                                                                                                                                                                                                                                                                                                                                                                                                                     | Miaomiao Mai                                                                                                                                                                                                       |
|                                                                                                                                                                                                                                                                                                                                                                                                                                                                                                                                     | An'an Jiang                                                                                                                                                                                                        |
|                                                                                                                                                                                                                                                                                                                                                                                                                                                                                                                                     | Xiaolin Luo                                                                                                                                                                                                        |
|                                                                                                                                                                                                                                                                                                                                                                                                                                                                                                                                     | Xuebin Lv                                                                                                                                                                                                          |
|                                                                                                                                                                                                                                                                                                                                                                                                                                                                                                                                     | Vadim N. Gladyshev                                                                                                                                                                                                 |
|                                                                                                                                                                                                                                                                                                                                                                                                                                                                                                                                     | Xuewei Li                                                                                                                                                                                                          |
|                                                                                                                                                                                                                                                                                                                                                                                                                                                                                                                                     | Mingzhou Li, Ph.D.                                                                                                                                                                                                 |
| <b>Order of Authors Secondary Information:</b>                                                                                                                                                                                                                                                                                                                                                                                                                                                                                      |                                                                                                                                                                                                                    |
| <b>Opposed Reviewers:</b>                                                                                                                                                                                                                                                                                                                                                                                                                                                                                                           | <p>Martien A.M. Groenen<br/>professor, Wageningen University<br/>martien.groenen@wur.nl</p> <p>Yaping Zhang<br/>Professor, Kunming Institute of Zoology Chinese Academy of Sciences<br/>zhangyp@mail.kiz.ac.cn</p> |
| <b>Additional Information:</b>                                                                                                                                                                                                                                                                                                                                                                                                                                                                                                      |                                                                                                                                                                                                                    |
| <b>Question</b>                                                                                                                                                                                                                                                                                                                                                                                                                                                                                                                     | <b>Response</b>                                                                                                                                                                                                    |
| Are you submitting this manuscript to a special series or article collection?                                                                                                                                                                                                                                                                                                                                                                                                                                                       | No                                                                                                                                                                                                                 |
| <p><b>Experimental design and statistics</b></p> <p>Full details of the experimental design and statistical methods used should be given in the Methods section, as detailed in our <a href="#">Minimum Standards Reporting Checklist</a>. Information essential to interpreting the data presented should be made available in the figure legends.</p> <p>Have you included all the information requested in your manuscript?</p>                                                                                                  | Yes                                                                                                                                                                                                                |
| <p><b>Resources</b></p> <p>A description of all resources used, including antibodies, cell lines, animals and software tools, with enough information to allow them to be uniquely identified, should be included in the Methods section. Authors are strongly encouraged to cite <a href="#">Research Resource Identifiers</a> (RRIDs) for antibodies, model organisms and tools, where possible.</p> <p>Have you included the information requested as detailed in our <a href="#">Minimum Standards Reporting Checklist</a>?</p> | Yes                                                                                                                                                                                                                |

**Availability of data and materials**

Yes

All datasets and code on which the conclusions of the paper rely must be either included in your submission or deposited in [publicly available repositories](#) (where available and ethically appropriate), referencing such data using a unique identifier in the references and in the “Availability of Data and Materials” section of your manuscript.

Have you have met the above requirement as detailed in our [Minimum Standards Reporting Checklist](#)?

---

# 1 Comparative transcriptomics of five high-altitude 2 vertebrates and their low-altitude relatives

3 Qianzi Tang<sup>1†</sup>, Yiren Gu<sup>2†\*</sup>, Xuming Zhou<sup>3†</sup>, Long Jin<sup>1</sup>, Jiuqiang Guan<sup>4</sup>, Rui Liu<sup>1</sup>, Jing Li<sup>1</sup>,  
4 Kereng Long<sup>1</sup>, Shilin Tian<sup>1</sup>, Tiandong Che<sup>1</sup>, Silu Hu<sup>1</sup>, Yan Liang<sup>2</sup>, Xuemei Yang<sup>2</sup>, Xuan  
5 Tao<sup>2</sup>, Zhijun Zhong<sup>2</sup>, Guosong Wang<sup>1,5</sup>, Xiaohui Chen<sup>2</sup>, Diyan Li<sup>1</sup>, Jideng Ma<sup>1</sup>, Xun  
6 Wang<sup>1</sup>, Miaomiao Mai<sup>1</sup>, An'an Jiang<sup>1</sup>, Xiaolin Luo<sup>4</sup>, Xuebin Lv<sup>2</sup>, Vadim N. Gladyshev<sup>3</sup>,  
7 Xuewei Li<sup>1\*</sup> and Mingzhou Li<sup>1\*</sup>

8 <sup>1</sup> Institute of Animal Genetics and Breeding, College of Animal Science and Technology,  
9 Sichuan Agricultural University, Chengdu 611130, China;

10 <sup>2</sup> Animal Breeding and Genetics Key Laboratory of Sichuan Province, Pig Science Institute,  
11 Sichuan Animal Science Academy, Chengdu 610066, China

12 <sup>3</sup> Division of Genetics, Department of Medicine, Brigham and Women's Hospital, Harvard  
13 Medical School, Boston, Massachusetts, 02115 USA;

14 <sup>4</sup> Yak Research Institute, Sichuan Academy of Grassland Science, Chengdu 610097,  
15 China;

16 <sup>5</sup> Department of Animal Science, Texas A & M University, College Station, Texas, 77843  
17 USA.

18 † These authors contributed equally to this work.

19 Corresponding authors. E-mail: Mingzhou Li: [mingzhou.li@sicau.edu.cn](mailto:mingzhou.li@sicau.edu.cn), Xuewei Li:  
20 [xuewei.li@sicau.edu.cn](mailto:xuewei.li@sicau.edu.cn), Yiren Gu: [guyiren1128@163.com](mailto:guyiren1128@163.com).

---

## Abstract

26  
27 **Background:** Species living at high altitude are subject to strong selective  
28 pressures due to inhospitable environments (e.g., hypoxia, low temperature,  
29 high solar radiation, and lack of biological production), making these species  
30 valuable models for comparative analyses of local adaptation. Studies that  
31 examined high-altitude adaptation identified a vast array of rapidly evolving  
32 genes that characterize the dramatic phenotypic changes in high-altitude  
33 animals. However, how high-altitude environment shapes gene expression  
34 programs remains largely unknown.

35 **Findings:** We generated a total of 910 Gb high-quality RNA-seq data for 180  
36 samples derived from six tissues of five agriculturally important high-altitude  
37 vertebrates (Tibetan chicken, Tibetan pig, Tibetan sheep, Tibetan goat and yak),  
38 and their cross-fertile relatives living in geographically neighboring low-altitude  
39 regions. Of these, ~75% reads could be aligned to their respective reference  
40 genomes, and on average ~70% of annotated protein coding genes in each  
41 organism showed FPKM expression values greater than 0.1. We observed a  
42 general concordance in topological relationships between the nucleotide  
43 alignments and gene expression-based trees. Tissue and species accounted  
44 for markedly more variance than altitude based on either the expression or the  
45 alternative splicing patterns. Cross-species clustering analyses showed a  
46 tissue-dominated pattern of gene expression, and a species-dominated pattern  
47 for alternative splicing. We also identified numerous differentially expressed  
48 genes were potentially involved in phenotypic divergence shaped by high-  
49 altitude adaptation.

50 **Conclusions:** This data serves as a valuable resource for examining the

---

51 convergence and divergence of gene expression changes between species as  
52 they adapt or acclimatize to high-altitude environments.

53 **Keywords:** high-altitude vertebrates, comparative transcriptomics, gene  
54 expression, alternative splicing

55

## 56 **Data description**

### 57 ***Transcriptome sequencing***

58 Six tissues (heart, kidney, liver, lung, skeletal muscle and spleen) of three  
59 unrelated adult females for each of five high-altitude vertebrates and their low-  
60 altitude relatives were sampled (**Fig. 1a** and **Supplementary Fig. S1**). Animals  
61 were sacrificed humanely to ameliorate suffering. All animals and samples used  
62 in this study were collected according to the guidelines for the care and use of  
63 experimental animals established by the Ministry of Agriculture of China. We  
64 extracted total RNA, prepared libraries and sequenced the libraries on Illumina  
65 HiSeq 2000 or 2500 platforms. We generated a total of ~909.6 Gb high-quality  
66 RNA-seq data for 180 samples (~5.05 Gb per sample) of 30 individuals across  
67 6 tissues (**Supplementary Table S1**).

### 68 ***Whole-genome re-sequencing***

69 To compare the phylogeny derived from gene expression with the phylogenetic  
70 relationships of the five high-altitude vertebrates and their low-altitude relatives,  
71 we constructed the phylogenetic tree based on nucleotide alignments. We  
72 extracted the unassembled reads from short-insert (500 bp) libraries of a single  
73 yak [1] (NCBI-SRA: SRX103159 to SRX103161, and SRX103175 and  
74 SRX103176), a Tibetan pig [2] (NCBI-SRA: SRX219342) and a low-altitude  
75 Rongchang pig (NCBI-SRA: SRX1544519) [3] that were used for *de novo*

---

76 assemblies to roughly 10 × depth coverage. We also randomly selected an  
77 individual of the cattle, low- and high-altitude chicken, goat and sheep, and  
78 sequenced their whole genomes at ~10 × depth coverage (NCBI-SRA:  
79 SRP096151). Genomic DNA was extracted from blood tissue of each individual.  
80 Sequencing was performed on the Illumina X Ten platform, and a total of 198.64  
81 Gb of paired-end DNA sequence was generated (**Supplementary Table S2**).

82

## 83 **Data analysis**

### 84 ***Data filtering***

85 To avoid reads with artificial bias, we removed the following type of reads: (a)  
86 Reads with ≥ 10% unidentified nucleotides (N); (b) Reads with > 10 nt aligned  
87 to the adapter, allowing ≤ 10% mismatches; (c) Reads with > 50% bases having  
88 phred quality < 5.

### 89 ***Identification of single-copy orthologous genes***

90 Single-copy orthologous genes across five reference genomes, i.e. chicken  
91 (Galgal4) [4], pig (Suscrofa 10.2) [5], cattle (UMD3.1) [6], goat (CHIR\_1.0) [7]  
92 and sheep (Oar\_v3.1) [8] were determined using a EnsemblCompara  
93 GeneTrees method [9] (**Supplementary Fig. S2**).

### 94 ***Construction of phylogenetic tree based on nucleotide alignments***

95 High-quality re-sequencing data were mapped to their respective reference  
96 genomes using BWA software (version 0.7.7) [10], reads with mapping quality >  
97 0 were retained and potential PCR duplication cases were removed. For each  
98 individual, ~97.01% of reads were mapped to ~97.40% (at least 1 × depth  
99 coverage) or ~91.86% (at least 4 × depth coverage) of the reference genome



---

100 assemblies (**Supplementary Table S2**). Single nucleotide variations (SNVs)  
101 and insertion and deletions (InDels) were further detected by following GATK's  
102 best practice (version 3.3-0) [11]. We substituted SNVs and InDels identified in  
103 our study in the coding DNA sequences (CDS) of the respective reference  
104 genomes. Single copy orthologues with substituted CDS of the five vertebrates  
105 were applied to Treebest [12] and generating the neighbor-joining tree (**Fig. 1b**).

### 106 *Analyses of gene expression*

107 High-quality RNA-seq reads were mapped to their respective reference  
108 genomes using Tophat (version 2.0.11) [13]. Cufflinks (version 2.2.1) [14] was  
109 applied to quantify gene expression and obtain FPKM expression values. We  
110 generated abundance files by applying Cuffquant (part of Cufflinks) to read  
111 mapping results. Log<sub>2</sub>-transformed values of (FPKM + 1) were used in  
112 subsequent analyses.

113 Pearson's correlations were calculated across six samples from low- and  
114 high-altitudes populations within each group of specific tissue and animals;  
115 among pairwise comparisons of five animals within each of the six tissues; and  
116 among pairwise comparisons of six tissues within each of the five animals.  
117 Principal Variance Component Analysis (PVCA) was carried out using R  
118 package pvca [15]. Neighbor-joining expression-based trees were generated  
119 according to distance matrices composed of pairwise (1-Spearman's  
120 correlations) implemented in R package ape [16]. Reproducibility of branching  
121 patterns was estimated by bootstrapping genes, that is, the single copy  
122 orthologues were randomly sampled with replacement 100 times. The fractions  
123 of replicate trees that share the branching patterns of the original tree  
124 constructed were marked by distinct node colors in the figure.

---

125 We generated abundance files by applying Cuffquant (part of Cufflinks) to  
126 read mapping results, and further applied abundance files to Cuffdiff (part of  
127 Cufflinks) to detect DEGs between population pairs from distinct altitudes  
128 within each group of specific tissue and species. Genes with FDR-adjusted p-  
129 values  $\leq 0.05$  were detected as DEGs.

130 Genes were converted to human orthologs, and assessed by DAVID [17]  
131 webserver for functional enrichment in GO (Gene Ontology) terms consisting  
132 of molecular function (MF) and biological process (BP) as well as the KEGG  
133 pathways and InterPro databases (Benjamini adjusted p-values  $\leq 0.05$ ).

#### 134 ***Analyses of alternative splicing***

135 Single-copy orthologous exons were identified by finding annotated exons that  
136 overlapped with the query exonic region in a multiple alignment of 99 vertebrate  
137 genomes including human genome (hg38) from the UCSC genome browser  
138 [18]. Exon groups with multiple overlapping exons in any species were excluded.  
139 Each internal exon in every annotated transcript was taken as an “cassette”  
140 exon. Each “cassett” alternative splicing (AS) is composed of three exons: C1,  
141 A and C2, where A is alternative exon, C1 the 5' alternative exon, C2 the 3'  
142 alternative exon. For each species and read length k, we generated all non-  
143 redundant constitutive and alternative junction sequences for the following  
144 RNA-seq alignments. The junction sequences were constructed by retrieving  
145 k-8 bp from each of the two exons making up the junction, and when the exon  
146 length is smaller than k-8, the whole sequence of the exon is retrieved. This  
147 ensures that there is at least 8 bp overlap between the mapped reads and each  
148 of the two junction exons.

149 We then estimated the effective number of uniquely mappable positions of

---

150 the junctions. We extracted L-k+1 (L being the junction length) k-mers from  
151 each junction and mapped such k-mers back to the reference genome allowing  
152 up to two mismatches. Those k-mers that failed to align were further mapped  
153 to the non-redundant junctions. The number of k-mers that could uniquely align  
154 to a junction was counted and deemed as the effective number of uniquely  
155 mappable positions for the junction.

156 For each sample, RNA-seq reads were first aligned to the reference genome  
157 allowing up to two mismatches, and the unaligned reads were further mapped  
158 to the non-redundant junctions. Uniquely mapped reads for each junction were  
159 counted, and multiplied by the ratio between the maximum number of mappable  
160 positions (i.e. k-15) to the effective number of uniquely mappable positions for  
161 the junction.

162 The “percent-spliced in” (PSI) values for each internal exon was defined as  
163  $PSI = 100 \times \text{average}(\#C1A, \#AC2) / (\#C1C2 + \text{average}(\#C1A, \#AC2))$ , here  
164 #C1A, #AC2 and #C1C2 are the normalized read counts for the associated  
165 junctions. Exons were taken as alternative in a sample if  $5 \leq PSI \leq 95$ . We also  
166 defined “high-confidence” PSI levels as those that meet the following criteria:

167  $\text{*max}(\text{min}(\#C1A, \#AC2), \#C1C2) \geq 5 \text{ AND } \text{min}(\#C1A, \#AC2) + \#C1C2 \geq 10$

168  $\text{*}|\log_2(\#C1A / \#AC2)| \leq 1 \text{ OR } \text{max}(\#C1A, \#AC2) < \#C1C2$

169 For cross-species analyses, we included exons with single-copy orthologues  
170 in all species, PSI values in all samples, and confidently alternative spliced in  
171 at least one of the samples.

172

173

174

---

## Findings

### 176 ***Data summary***

177 We generated a total of ~909.6 Gb high-quality RNA-seq data, of which ~676.6  
178 Gb (~74.6%) reads could reliably aligned to their respective reference genomes  
179 **(Supplementary Fig. S3 and Table S1)**. We found that on average 69.7%  
180 annotated protein coding genes in each genome had FPKM expression values  
181 greater than 0.1 **(Supplementary Fig. S4 and Table S3)**.

### 182 ***Concordance in the tree topology based on nucleotide sequence*** 183 ***alignments and gene expression data***

184 Nucleotide alignments-based phylogenetic relationships of these high-altitude  
185 vertebrates and their low-altitude relatives matched the established  
186 morphological species groupings and the known history of population formation  
187 **(Fig. 1b)**. The gene expression-based tree based 7,125 high-confidence single-  
188 copy orthologous genes for each tissue showed a highly consistent topology to  
189 the nucleotide sequence alignment-based phylogeny **(Fig. 2)**: mammals were  
190 mainly divided into omnivore (pig) and ruminant (goat, sheep and yak/cattle);  
191 within the ruminant cluster, the two caprinae (goat and sheep) were closer to  
192 each other than the bovine (yak/cattle). This observation lends supports the  
193 idea that gene expression changes evolve together with genetic variation over  
194 evolutionary time, resulting in lower expression divergence between more  
195 closely species [19].

### 196 ***Distinctly transcriptomic characteristics between gene expression and*** 197 ***alternative splicing***

198 Through comparison of expression levels of 7,125 high-confidence single-  
199 copy orthologous genes **(Supplementary Fig. S2)** and alternative splicing

---

200 patterns (reflected by PSI values) of 2,783 orthologous exons shared by the  
201 five vertebrates genomes, we observed a tissue-dominated clustering pattern  
202 of gene expression, but a species-dominated clustering pattern of alternative  
203 splicing [20, 21].

204 For gene expression, there were critical biological differences among tissues  
205 (Pearson's  $r = 0.71$  and weighted average proportion variance = 0.42), followed  
206 by species (Pearson's  $r = 0.84$ , weighted average proportion variance = 0.16)  
207 and local adaptation (Pearson's  $r = 0.97$  and weighted average proportion  
208 variance = 0.019) (**Fig. 3a** and **Supplementary Fig. S5**). By contrast, for  
209 alternative splicing, the differences among species (Pearson's  $r = 0.64$  and  
210 weighted average proportion variance = 0.30) were higher than among tissues  
211 (Pearson's  $r = 0.78$  and weighted average proportion variance = 0.075),  
212 followed by between high- and low-altitude animals (Pearson's  $r = 0.84$  and  
213 weighted average proportion variance = 0.021) (**Fig. 3b** and **Supplementary**  
214 **Figure S6**).

215 Unsupervised clustering (**Figs. 4a** and **4c**) and principal components  
216 analysis (PCA) (**Figs. 4b** and **4d** and **Supplementary Figs. S7** and **S8**) both  
217 recapitulated the distinctly transcriptomic characteristics between gene  
218 expression and alternative splicing. Tissue-dominated clustering of gene  
219 expression indicated that in general tissues possess conserved gene  
220 expression signatures and suggested that conserved gene expression  
221 differences underlie tissue identity in mammals. On the other hand, greater  
222 prominence of species-dominated clustering of alternative splicing suggested  
223 that exon splicing is more often affected by species-specific changes in *cis*-  
224 regulatory elements and/or *trans*-acting factors than gene expression [20, 21].

---

225 Notably, tissue-dominated clustering patterns of gene expression further  
226 revealed that the cluster of striated muscle (heart and skeletal muscle) and the  
227 cluster of vessel-rich tissues (lung and spleen) were closer to each other than  
228 the cluster of metabolic tissues (kidney and liver), followed by the distinct  
229 clusters of bird (chicken) and mammals according to the evolutionary distance  
230 **(Figs. 4a and 4b)**. The exceptions to tissue dominance were that chicken heart,  
231 lung and liver clustered with chicken skeletal muscle, spleen and kidney,  
232 respectively, rather than with their mammalian counterparts, which implied that  
233 divergence in gene expression among these species started to surpass those  
234 between different tissues at about the time when birds split from mammals  
235 (~300 million years) **(Figs. 4a and 4b)**.

### 236 ***Gene expression plasticity to a high-altitude environment***

237 To exclude the impact of prominence of tissues-dominated clustering of gene  
238 expression, so as to comprehensively present transcriptomic differences  
239 involved in high-altitude response based on whole annotated genes of their  
240 respective genome assembly instead of the single-copy orthologous, we  
241 measured the pairwise difference of gene expression between the high-altitude  
242 populations and their low-altitude relatives within each tissue for each  
243 vertebrate.

244 We identified ~1,512 DEGs between 30 low- versus high-altitude pairs (225  
245 DEGs in liver of pigs to 4,014 DEGs in kidney of sheep) **(Table 1)**. Notably,  
246 among five pairs of vertebrate, the highly-diverged yak and cattle [1] exhibited  
247 the highest number of DEG (~2,242) across six tissues. Among six tissues, the  
248 highly aerobic kidney [22] exhibited the highest number of DEGs (~2,103)  
249 across five pairs of vertebrates. As expected, respectable significantly enriched

---

1 250 functional gene categories by DGEs, which shared in multiple pair-wise  
2 251 comparisons, were potentially related to the dramatic phenotypic changes  
3  
4 252 shaped by high-altitude adaptation, such as response to hypoxia (typically,  
5  
6  
7 253 'oxidation reduction', 'heme binding', 'oxygen binding' , 'response to oxygen  
8  
9 254 levels' and 'response to hypoxia'), cardiovascular system ('blood vessel  
10  
11 255 development', 'blood vessel morphogenesis', 'blood circulation' and  
12  
13 256 'development of lung and heart'), the efficiency of biomass production in the  
14  
15  
16 257 resource-poor highland (processes of 'steroid biosynthesis' and 'fatty acid  
17  
18 258 metabolism') as well as immune response ("responses of immune and defense")  
19  
20  
21 259 **(Additional file 2).**  
22  
23  
24  
25 260  
26  
27  
28 261 **Conclusions**  
29  
30  
31 262 High-altitude adaptive evolution of transcription, and the convergence and  
32  
33 263 divergence of transcriptional alteration across species in response to high-  
34  
35 264 altitude environments, is an important topic of broad interest to the general  
36  
37 265 biology community. Here we provide a comprehensive comparative  
38  
39 266 transcriptome landscape of expression and alternative splicing variation  
40  
41 267 between low- and high-altitude populations across multiple species for distinct  
42  
43 268 tissues. Our data serves a valuable resource for further study on gene  
44  
45 269 regulatory changes to adaptive evolution of complex phenotypes.  
46  
47  
48  
49  
50 270 **Availability of supporting data**  
51  
52  
53 271 The RNA-seq data for 180 samples was deposited in the NCBI Gene  
54  
55 272 Expression Omnibus (GEO) under accession numbers GSE93855, GSE77020  
56  
57 273 and GSE66242. The re-sequencing data for 7 individuals was deposited in the  
58  
59  
60  
61  
62  
63  
64  
65

---

274 NCBI-sequence read archive (SRA) under accession number SRP096151.

275 All supplementary figures and tables are provided in Additional file.

276 **Reviewer links:**

277 GSE93855:

278 <https://www.ncbi.nlm.nih.gov/geo/query/acc.cgi?token=irqtigkgvtatnqt&acc=G>

279 [SE93855](#)

280 GSE77020:

281 <https://www.ncbi.nlm.nih.gov/geo/query/acc.cgi?token=kpolsqsothybrcv&acc=>

282 [GSE77020](#) (GSM1617847-GSM1617849 and GSM2042608-GSM2042610 are

283 duplicates and represent the same samples)

284 GSE66242:

285 <https://www.ncbi.nlm.nih.gov/geo/query/acc.cgi?token=absxuuywtfyhncx&acc=>

286 [=GSE66242](#) (9 goat samples derived from individuals sampled at 2000m

287 altitude were not included in this study)

288

289 **Ethics statement**

290 All studies involving animals were conducted according to Regulations for the

291 Administration of Affairs Concerning Experimental Animals (Ministry of Science

292 and Technology, China, revised in June 2004). All experimental procedures and

293 sample collection methods in this study were approved by the Institutional

294 Animal Care and Use Committee of the College of Animal Science and

295 Technology of Sichuan Agricultural University, Sichuan, China, under permit No.

296 DKY-B20121406. Animals were allowed free access to food and water under



---

297 normal conditions, and were humanely sacrificed as necessary, to ameliorate  
298 suffering.

299 **Consent for publication**

300 Not applicable.

301 **Competing interests**

302 The authors declare that they have no competing interests.

303 **Funding**

304 This work was supported by grants from the National High Technology  
305 Research and Development Program of China (863 Program) (2013AA102502),  
306 the National Natural Science Foundation of China (31402046, 31522055,  
307 31601918, 31530073 and 31472081), the Science & Technology Support  
308 Program of Sichuan (2016NYZ0042), the Youth Science Fund of Sichuan  
309 (2017JQ0011), the China Postdoctoral Science Foundation (2015M572486),  
310 China Agriculture Research System (CARS-36), the Program for Innovative  
311 Research Team of Sichuan Province (2015TD0012), the Program for Pig  
312 Industry Technology System Innovation Team of Sichuan Province (SCCXTD-  
313 005), the Project of Sichuan Education Department (15ZA0008, 15ZA0003,  
314 16ZA0025 and 16ZB0037), the National Program for Support of Top-notch  
315 Young Professionals and the Young Scholars of the Yangtze River.

316 **Authors' contributions**

317 MZ.L., QZ.T., YR.G. and XW.L. designed and supervised the project. JQ.G.,  
318 TD.C., SL.H., Y.L., XM.Y., X.T., ZJ.Z., XH.C., DY.L., XL.L. and XB.L. collected  
319 the data, L.J., R.L., J.L., KR.L., SL.T., GS.W., JD.M., X.W., MM.M. and AA.J.  
320 generated the data. QZ.T. and MZ.L. performed the bioinformatics analyses.

---

321 QZ.T. and MZ.L. wrote the manuscript. XM.Z. and VN.G. revised the manuscript.

322

323

324

325 **References**

326

- 327 1. Qiu Q, Zhang G, Ma T, Qian W, Wang J, Ye Z, et al. The yak genome and  
328 adaptation to life at high altitude. *Nat Genet.* 2012;44 8:946-9.  
329 doi:10.1038/ng.2343.
- 330 2. Li M, Tian S, Jin L, Zhou G, Li Y, Zhang Y, et al. Genomic analyses identify  
331 distinct patterns of selection in domesticated pigs and Tibetan wild boars.  
332 *Nature genetics.* 2013;45 12:1431-8. doi:10.1038/ng.2811.
- 333 3. Li M, Chen L, Tian S, Lin Y, Tang Q, Zhou X, et al. Comprehensive variation  
334 discovery and recovery of missing sequence in the pig genome using multiple  
335 *de novo* assemblies. *Genome Res.* 2016; doi:10.1101/gr.207456.116.
- 336 4. International Chicken Genome Sequencing Consortium. Sequence and  
337 comparative analysis of the chicken genome provide unique perspectives on  
338 vertebrate evolution. *Nature.* 2004;432 7018:695-716.  
339 doi:10.1038/nature03154.
- 340 5. Groenen MA, Archibald AL, Uenishi H, Tuggle CK, Takeuchi Y, Rothschild MF,  
341 et al. Analyses of pig genomes provide insight into porcine demography and  
342 evolution. *Nature.* 2012;491 7424:393-8. doi:10.1038/nature11622.
- 343 6. Bovine Genome S, Analysis C, Elsik CG, Tellam RL, Worley KC, Gibbs RA, et al.  
344 The genome sequence of taurine cattle: a window to ruminant biology and  
345 evolution. *Science.* 2009;324 5926:522-8. doi:10.1126/science.1169588.

- 
- 1  
2  
3  
4  
5  
6  
7  
8  
9  
10  
11  
12  
13  
14  
15  
16  
17  
18  
19  
20  
21  
22  
23  
24  
25  
26  
27  
28  
29  
30  
31  
32  
33  
34  
35  
36  
37  
38  
39  
40  
41  
42  
43  
44  
45  
46  
47  
48  
49  
50  
51  
52  
53  
54  
55  
56  
57  
58  
59  
60  
61  
62  
63  
64  
65
- 346 7. Dong Y, Xie M, Jiang Y, Xiao N, Du X, Zhang W, et al. Sequencing and  
347 automated whole-genome optical mapping of the genome of a domestic  
348 goat (*Capra hircus*). Nat Biotechnol. 2013;31 2:135-41. doi:10.1038/nbt.2478.
  - 349 8. Jiang Y, Xie M, Chen W, Talbot R, Maddox JF, Faraut T, et al. The sheep  
350 genome illuminates biology of the rumen and lipid metabolism. Science.  
351 2014;344 6188:1168-73. doi:10.1126/science.1252806.
  - 352 9. Vilella AJ, Severin J, Ureta-Vidal A, Heng L, Durbin R and Birney E.  
353 EnsemblCompara GeneTrees: Complete, duplication-aware phylogenetic  
354 trees in vertebrates. Genome Res. 2009;19 2:327-35.  
355 doi:10.1101/gr.073585.107.
  - 356 10. Li H and Durbin R. Fast and accurate long-read alignment with Burrows-  
357 Wheeler transform. Bioinformatics. 2010;26 5:589-95.  
358 doi:10.1093/bioinformatics/btp698.
  - 359 11. McKenna A, Hanna M, Banks E, Sivachenko A, Cibulskis K, Kernytzky A, et al.  
360 The Genome Analysis Toolkit: a MapReduce framework for analyzing next-  
361 generation DNA sequencing data. Genome Res. 2010;20 9:1297-303.  
362 doi:10.1101/gr.107524.110.
  - 363 12. Li H, Coghlan A, Ruan J, Coin LJ, Heriche JK, Osmotherly L, et al. TreeFam: a  
364 curated database of phylogenetic trees of animal gene families. Nucleic Acids  
365 Res. 2006;34 Database issue:D572-80. doi:10.1093/nar/gkj118.
  - 366 13. Trapnell C, Pachter L and Salzberg SL. TopHat: discovering splice junctions  
367 with RNA-Seq. Bioinformatics. 2009;25 9:1105-11.  
368 doi:10.1093/bioinformatics/btp120.
  - 369 14. Trapnell C, Williams BA, Pertea G, Mortazavi A, Kwan G, van Baren MJ, et al.

1  
2  
3  
4  
5  
6  
7  
8  
9  
10  
11  
12  
13  
14  
15  
16  
17  
18  
19  
20  
21  
22  
23  
24  
25  
26  
27  
28  
29  
30  
31  
32  
33  
34  
35  
36  
37  
38  
39  
40  
41  
42  
43  
44  
45  
46  
47  
48  
49  
50  
51  
52  
53  
54  
55  
56  
57  
58  
59  
60  
61  
62  
63  
64  
65

---

370 Transcript assembly and quantification by RNA-Seq reveals unannotated  
371 transcripts and isoform switching during cell differentiation. Nat Biotechnol.  
372 2010;28 5:511-5. doi:10.1038/nbt.1621.

373 15. The pvca R package.  
374 <https://bioconductor.org/packages/release/bioc/html/pvca.html>.  
375 Accessed Feb 16 2017.

376 16. Paradis E, Claude J and Strimmer K. APE: Analyses of Phylogenetics and  
377 Evolution in R language. Bioinformatics. 2004;20 2:289-90.

378 17. Dennis G, Jr., Sherman BT, Hosack DA, Yang J, Gao W, Lane HC, et al. DAVID:  
379 Database for Annotation, Visualization, and Integrated Discovery. Genome  
380 Biol. 2003;4 5:P3.

381 18. Kent WJ, Sugnet CW, Furey TS, Roskin KM, Pringle TH, Zahler AM, et al. The  
382 human genome browser at UCSC. Genome Res. 2002;12 6:996-1006.  
383 doi:10.1101/gr.229102. Article published online before print in May 2002.

384 19. Brawand D, Soumillon M, Necsulea A, Julien P, Csardi G, Harrigan P, et al. The  
385 evolution of gene expression levels in mammalian organs. Nature. 2011;478  
386 7369:343-8. doi:10.1038/nature10532.

387 20. Merkin J, Russell C, Chen P and Burge CB. Evolutionary dynamics of gene and  
388 isoform regulation in Mammalian tissues. Science. 2012;338 6114:1593-9.  
389 doi:10.1126/science.1228186.

390 21. Barbosa-Morais NL, Irimia M, Pan Q, Xiong HY, Gueroussov S, Lee LJ, et al.  
391 The evolutionary landscape of alternative splicing in vertebrate species.  
392 Science. 2012;338 6114:1587-93. doi:10.1126/science.1230612.

393 22. Mele M, Ferreira PG, Reverter F, DeLuca DS, Monlong J, Sammeth M, et al.  
 394 Human genomics. The human transcriptome across tissues and individuals.  
 395 Science. 2015;348 6235:660-5. doi:10.1126/science.aaa0355.

401 **Figures 1-4**

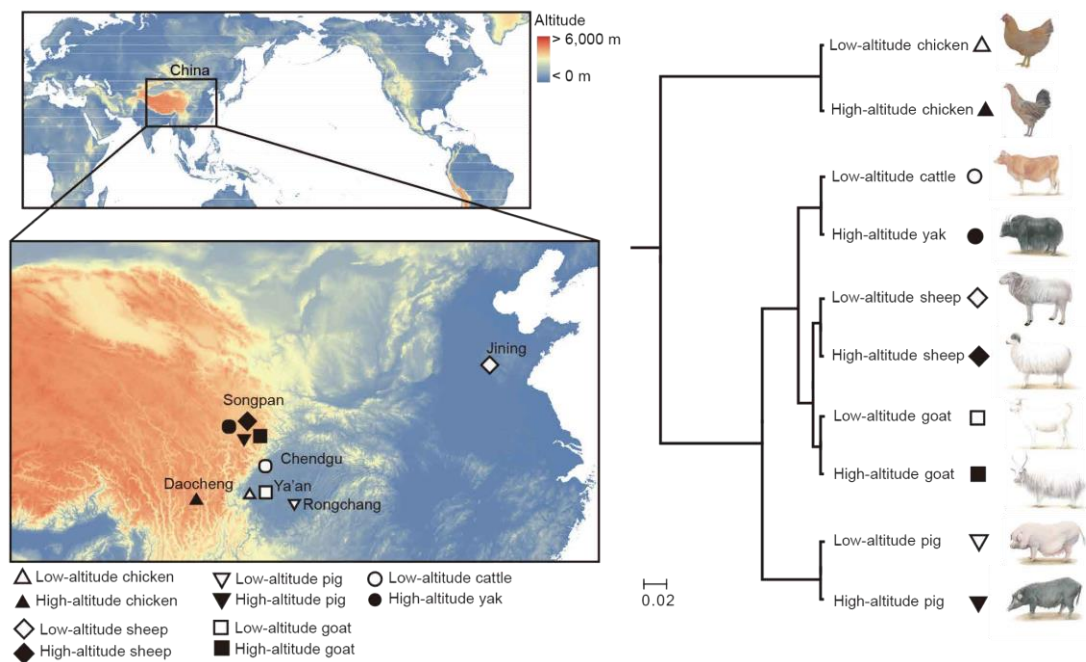

403

404

405 **Figure 1. Sampling locations and nucleotide alignment-based tree.**

406 **(a)** Geographic locations of the studied animals.

407 **(b)** A neighbour-joining tree constructed based on concatenated coding sequences of  
 408 single-copy orthologues substituted by SNVs and InDels detected in each animal.

409 We downloaded and extracted the unassembled reads from short-insert (500 bp) libraries  
 410 of a single yak [1], a Tibetan pig [2] and a Rongchang pig [3] that were used for *de novo*

---

1 411 assemblies to roughly 10 × depth coverage. We also randomly selected an individual of  
2 412 the cattle, low- and high-altitude chicken, goat and sheep and sequenced the whole  
3  
4 413 genomes at ~10 × depth coverage.  
5

6 414

7 415

8 416

9 417

10 418

11 419

12  
13  
14  
15  
16  
17  
18  
19  
20  
21  
22  
23  
24  
25  
26  
27  
28  
29  
30  
31  
32  
33  
34  
35  
36  
37  
38  
39  
40  
41  
42  
43  
44  
45  
46  
47  
48  
49  
50  
51  
52  
53  
54  
55  
56  
57  
58  
59  
60  
61  
62  
63  
64  
65

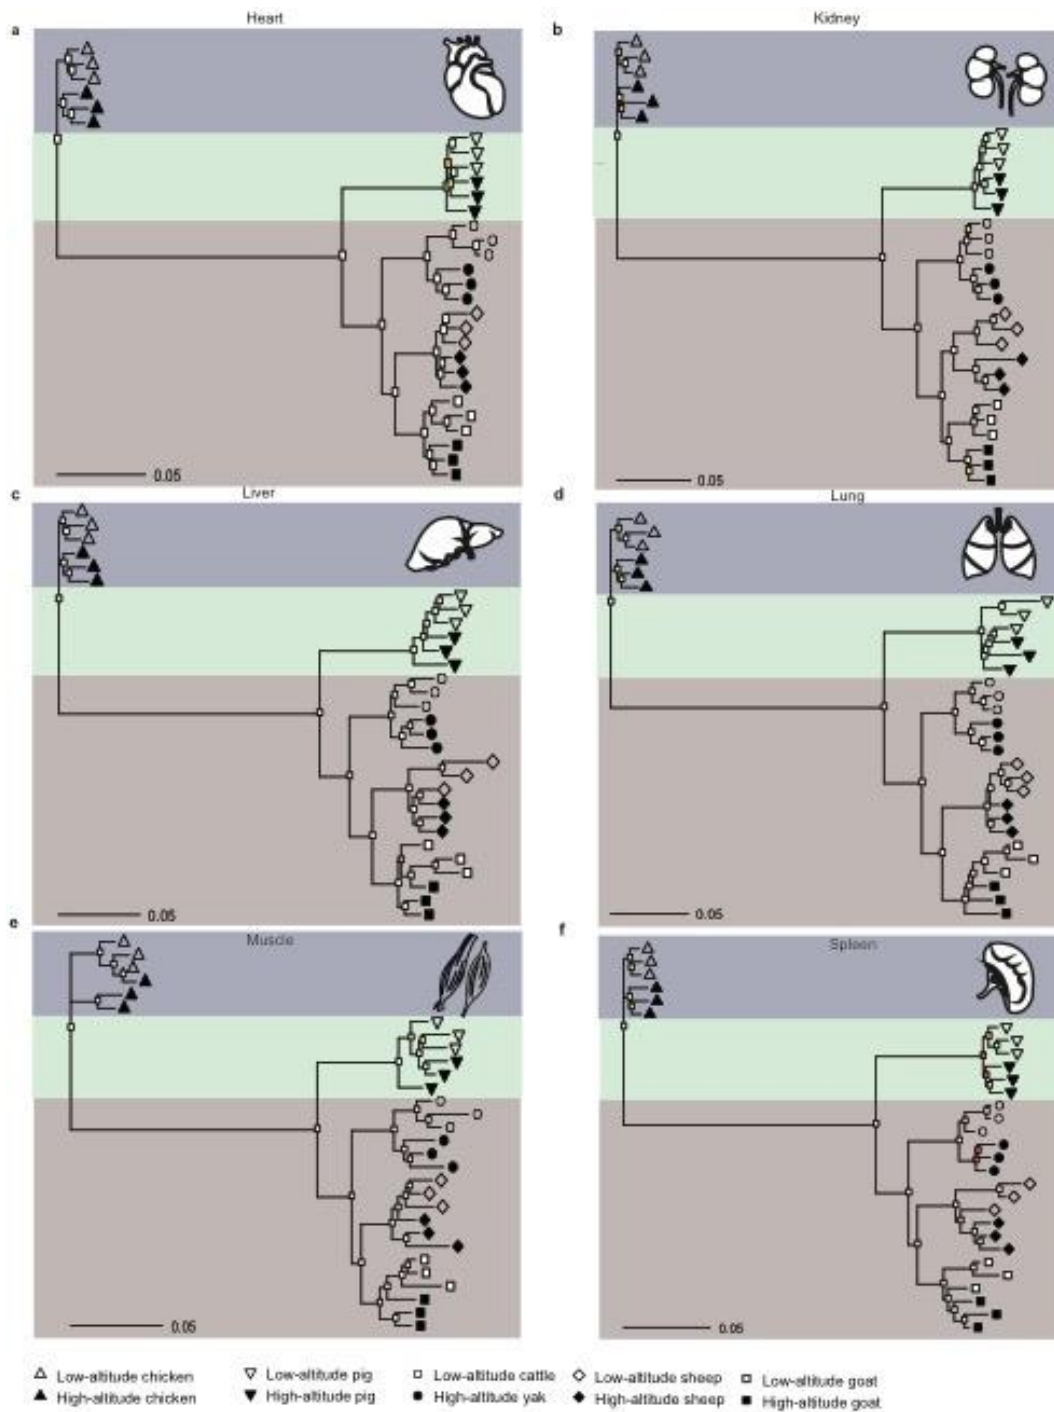

420

421

422 **Figure 2. Gene expression phylogenies for six tissues across five vertebrates.**

423 Neighbour-joining expression tree constructed based on (1-Spearman correlation)

424 distances in six tissues. We performed 100 bootstraps by randomly sampling the single

425 copy orthologues with replacement. Bootstrap values (fractions of replicate trees that have

426 the branching pattern as in the shown tree constructed using all the single copy

427 orthologues) are indicated by different colors: red color of the node indicates support from

428 less than 50% bootstraps, while orange, yellow and white colors indicate support between  
 429 50% and 70%, between 70% and 90% and more than 90%, respectively.

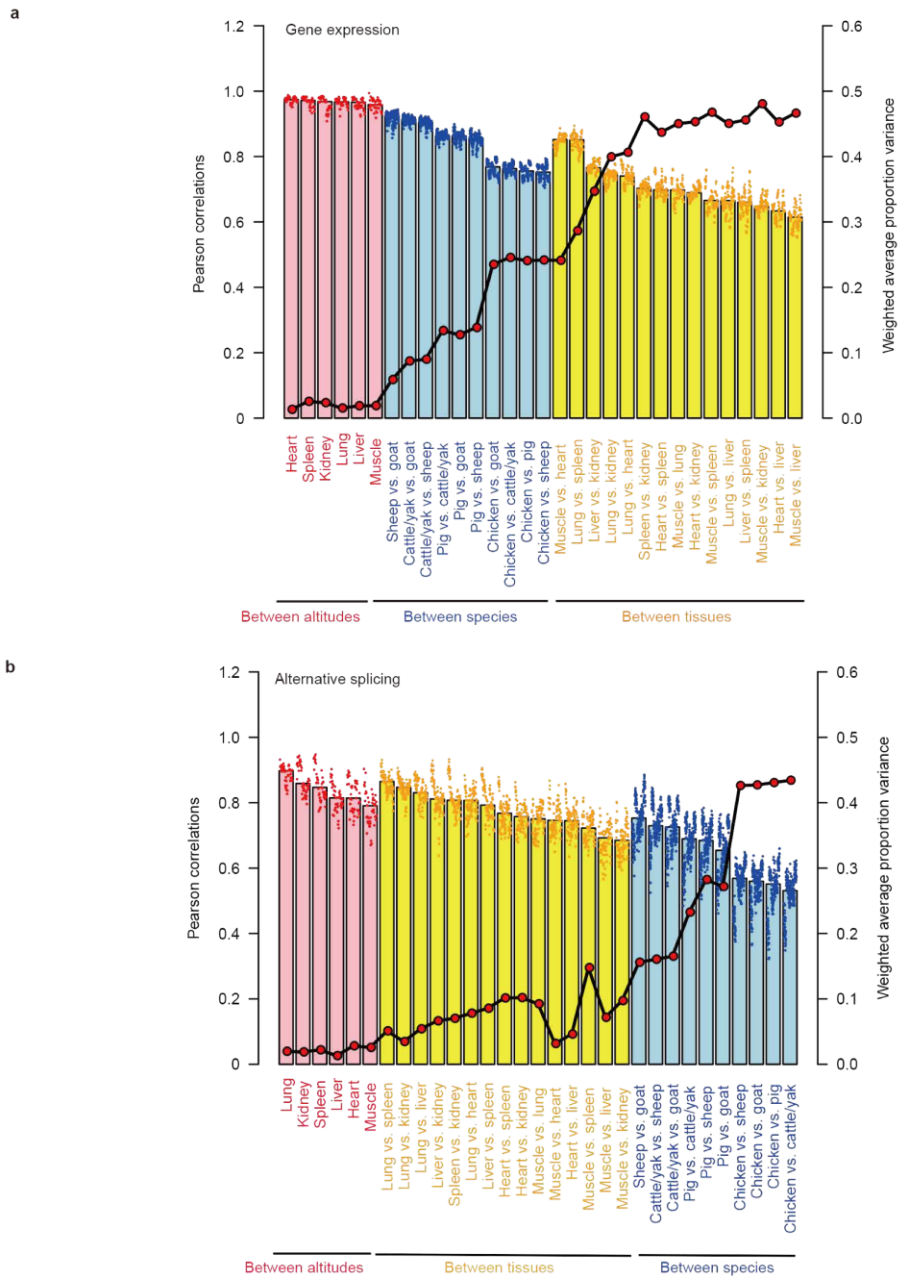

430  
 431 **Figure 3. Comparison of variations between altitudes, species and tissues revealed**  
 432 **by (a) gene expression and (b) alternative splicing pattern.**

433 Scatter-point and bar plots represent the pairwise Pearson's correlation between samples.  
 434 Weighted average proportion variance of the alternative splicing (reflected by PSI values)  
 435 were determined using the Principal Variance Component Analysis (PVCA) approach and  
 436 depicted as red dots by black lines.



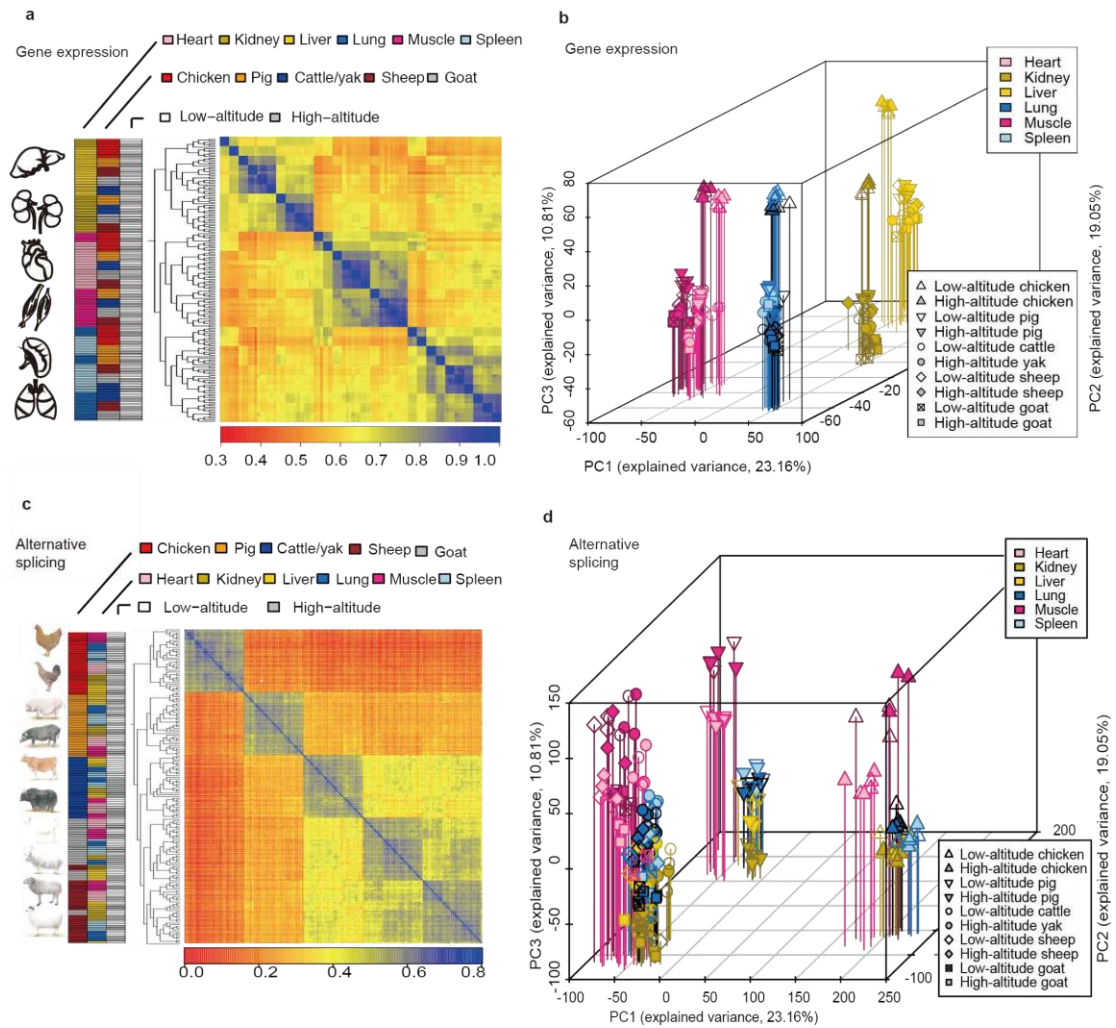

438

#### 439 **Figure 4. Global pattern of gene expression and alternative splicing pattern.**

440 Hierarchical clustering of samples using **(a)** the gene expression and **(c)** the alternative  
 441 splicing (reflected by PSI values). Average linkage hierarchical clustering was used with  
 442 distance between samples measured by the Pearson's correlation between the vectors of  
 443 expression values. Factorial map of the principal-component analysis (PCA) of **(b)** gene  
 444 expression levels and **(d)** the alternative splicing. The proportion of the variance  
 445 explained by the principal components is indicated in parentheses.

446

447

448

449

450

---

451

452

- 1
- 2
- 3
- 4
- 5
- 6
- 7
- 8
- 9
- 10
- 11
- 12
- 13
- 14
- 15
- 16
- 17
- 18
- 19
- 20
- 21
- 22
- 23
- 24
- 25
- 26
- 27
- 28
- 29
- 30
- 31
- 32
- 33
- 34
- 35
- 36
- 37
- 38
- 39
- 40
- 41
- 42
- 43
- 44
- 45
- 46
- 47
- 48
- 49
- 50
- 51
- 52
- 53
- 54
- 55
- 56
- 57
- 58
- 59
- 60
- 61
- 62
- 63
- 64
- 65

**Table 1. Number of DEGs between five high-altitude vertebrates and their low-altitude relatives for each tissue**

| Species    | Heart         | Kidney        | Liver        | Lung          | Muscle        | Spleen        | Mean          |
|------------|---------------|---------------|--------------|---------------|---------------|---------------|---------------|
| Chicken    | 1357 (8.76%)  | 784 (5.06%)   | 651 (4.20%)  | 1142 (7.37%)  | 191 (1.23%)   | 1011 (6.52%)  | 856 (5.52%)   |
| Pig        | 225 (1.04%)   | 572 (2.65%)   | 1218 (5.64%) | 453 (2.10%)   | 421 (1.95%)   | 1015 (4.70%)  | 651 (3.01%)   |
| Cattle/yak | 1692 (8.47%)  | 1868 (9.35%)  | 938 (4.69%)  | 3229 (16.16%) | 2520 (12.61%) | 2369 (11.86%) | 2103 (10.52%) |
| Sheep      | 1371 (6.56%)  | 4014 (19.20%) | 271 (1.30%)  | 1881 (9.00%)  | 1136 (5.43%)  | 2458 (11.76%) | 1855 (8.87%)  |
| Goat       | 2401 (10.85%) | 3973 (17.95%) | 729 (3.29%)  | 1461 (6.60%)  | 2597 (11.73%) | 1421 (6.42%)  | 2097 (9.48%)  |
| Mean       | 1409 (7.13%)  | 2242 (10.84%) | 761 (3.83%)  | 1633 (8.25%)  | 1373 (6.59%)  | 1655 (8.25%)  |               |

Percentage of the DGEs compared with the total number of annotated protein coding genes in their respective reference genomes are listed in parenthesis. There are 15495, 21594, 19981, 22131, 20908 annotated protein coding genes in reference genomes of Chicken (Galgal4) [4], pig (Suscrofa 10.2) [5], cattle (UMD3.1) [6], goat (CHIR\_1.0) [7] and sheep (Oar\_v3.1) [8], respectively.

**Table 1. Number of DEGs between five high-altitude vertebrates and their low-altitude relatives for each tissue**

| Species           | Heart         | Kidney        | Liver        | Lung          | Muscle        | Spleen        | Mean          |
|-------------------|---------------|---------------|--------------|---------------|---------------|---------------|---------------|
| <b>Chicken</b>    | 1357 (8.76%)  | 784 (5.06%)   | 651 (4.20%)  | 1142 (7.37%)  | 191 (1.23%)   | 1011 (6.52%)  | 856 (5.52%)   |
| <b>Pig</b>        | 225 (1.04%)   | 572 (2.65%)   | 1218 (5.64%) | 453 (2.10%)   | 421 (1.95%)   | 1015 (4.70%)  | 651 (3.01%)   |
| <b>Cattle/yak</b> | 1692 (8.47%)  | 1868 (9.35%)  | 938 (4.69%)  | 3229 (16.16%) | 2520 (12.61%) | 2369 (11.86%) | 2103 (10.52%) |
| <b>Sheep</b>      | 1371 (6.56%)  | 4014 (19.20%) | 271 (1.30%)  | 1881 (9.00%)  | 1136 (5.43%)  | 2458 (11.76%) | 1855 (8.87%)  |
| <b>Goat</b>       | 2401 (10.85%) | 3973 (17.95%) | 729 (3.29%)  | 1461 (6.60%)  | 2597 (11.73%) | 1421 (6.42%)  | 2097 (9.48%)  |
| <b>Mean</b>       | 1409 (7.13%)  | 2242 (10.84%) | 761 (3.83%)  | 1633 (8.25%)  | 1373 (6.59%)  | 1655 (8.25%)  |               |

Percentage of the DGEs compared with the total number of annotated protein coding genes in their respective reference genomes are listed in parenthesis. There are 15495, 21594, 19981, 22131, 20908 annotated protein coding genes in reference genomes of Chicken (Galgal4) [4], pig (Suscrofa 10.2) [5], cattle (UMD3.1) [6], goat (CHIR\_1.0) [7] and sheep (Oar\_v3.1) [8], respectively.

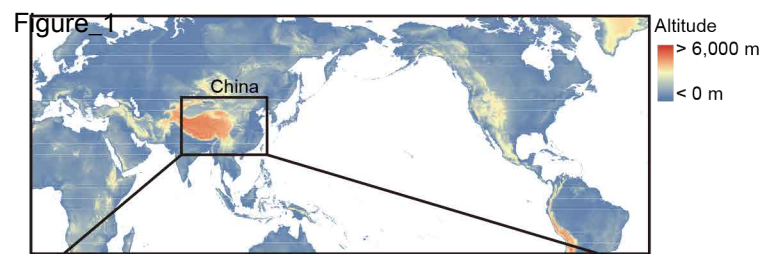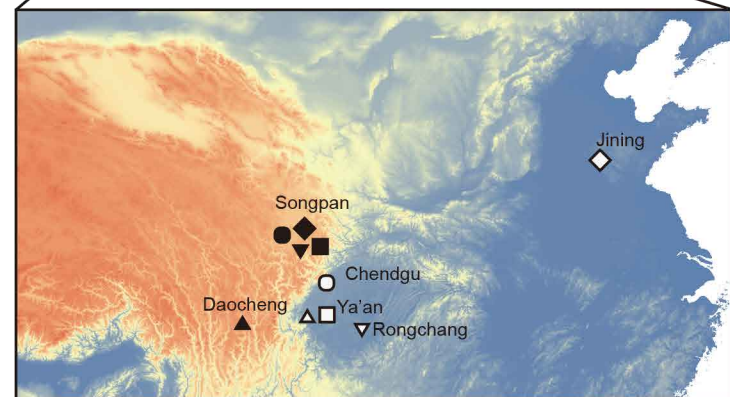

- |                         |                      |                       |
|-------------------------|----------------------|-----------------------|
| △ Low-altitude chicken  | ▽ Low-altitude pig   | ○ Low-altitude cattle |
| ▲ High-altitude chicken | ▼ High-altitude pig  | ● High-altitude yak   |
| ◇ Low-altitude sheep    | □ Low-altitude goat  |                       |
| ◆ High-altitude sheep   | ■ High-altitude goat |                       |

[Click here to download Figure Figure1.pdf](#)

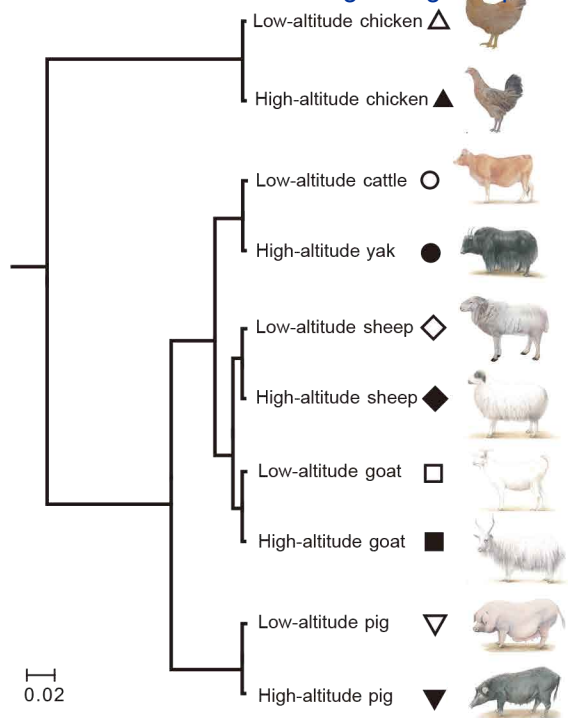

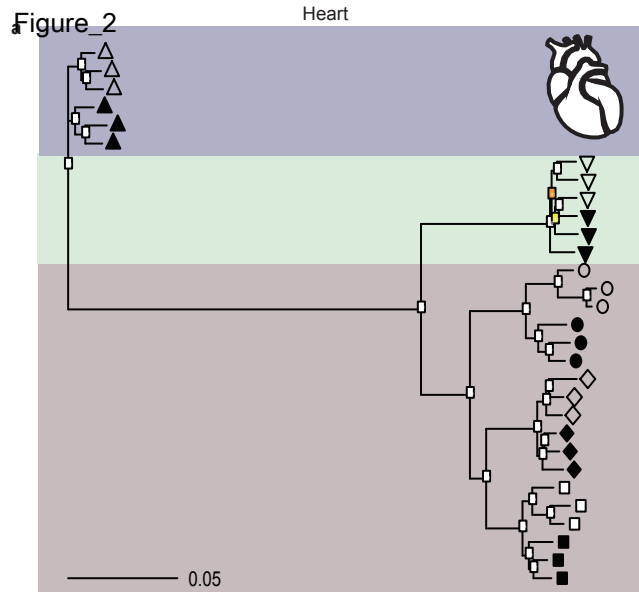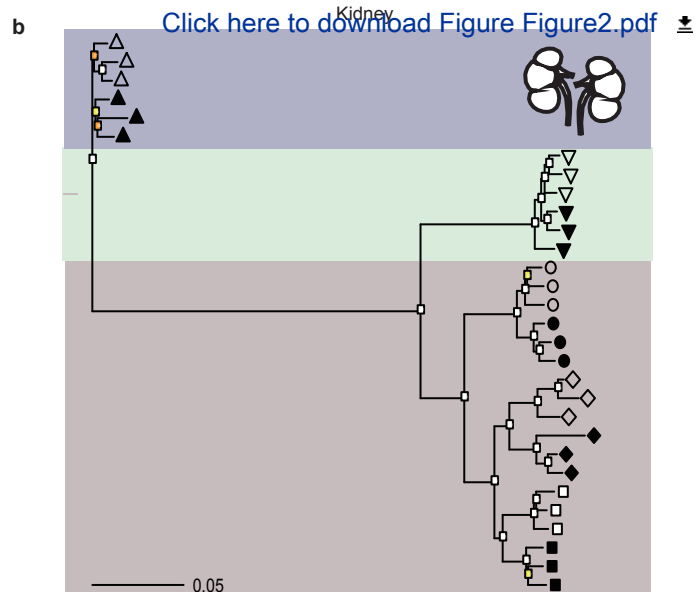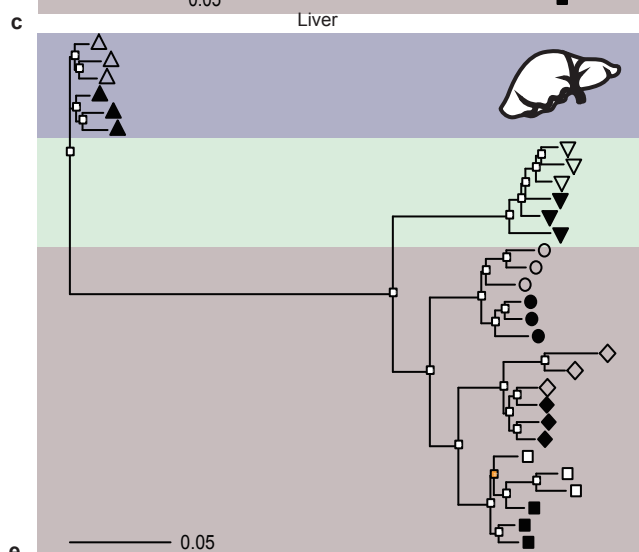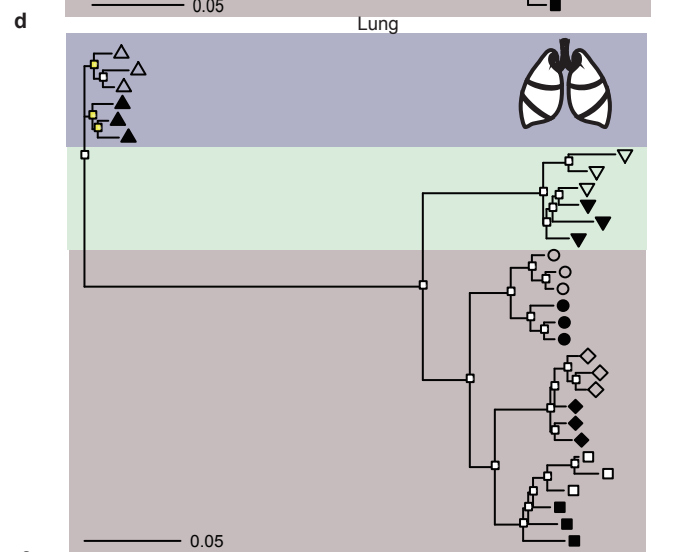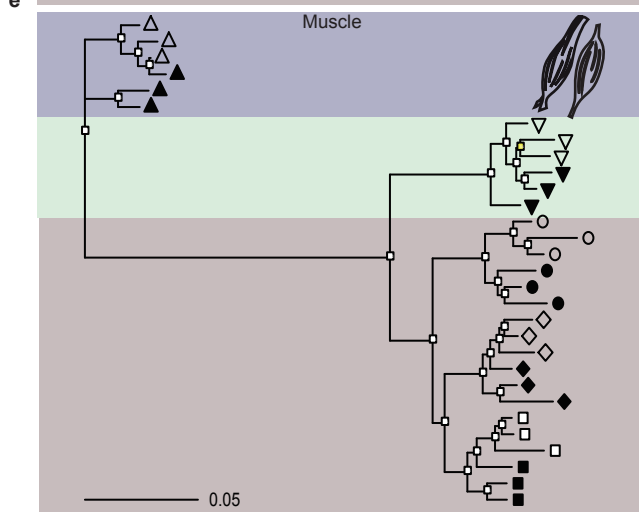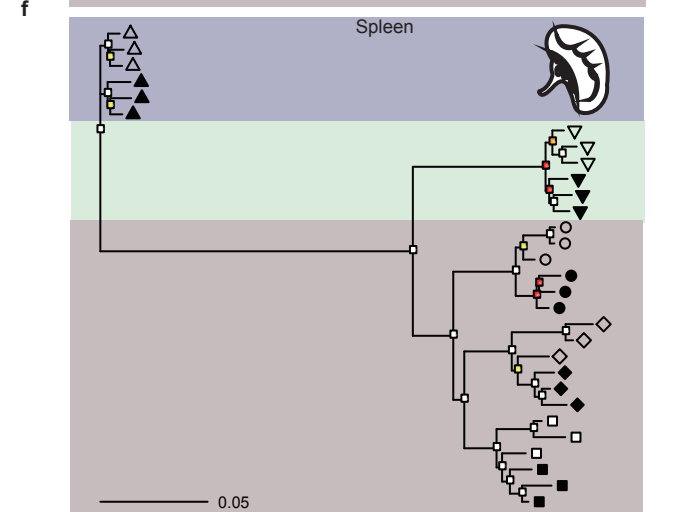

△ Low-altitude chicken    ▽ Low-altitude pig    ○ Low-altitude cattle    ◇ Low-altitude sheep    □ Low-altitude goat  
 ▲ High-altitude chicken    ▼ High-altitude pig    ● High-altitude yak    ◆ High-altitude sheep    ■ High-altitude goat

Figure\_3

[Click here to download Figure Figure3.pdf](#)

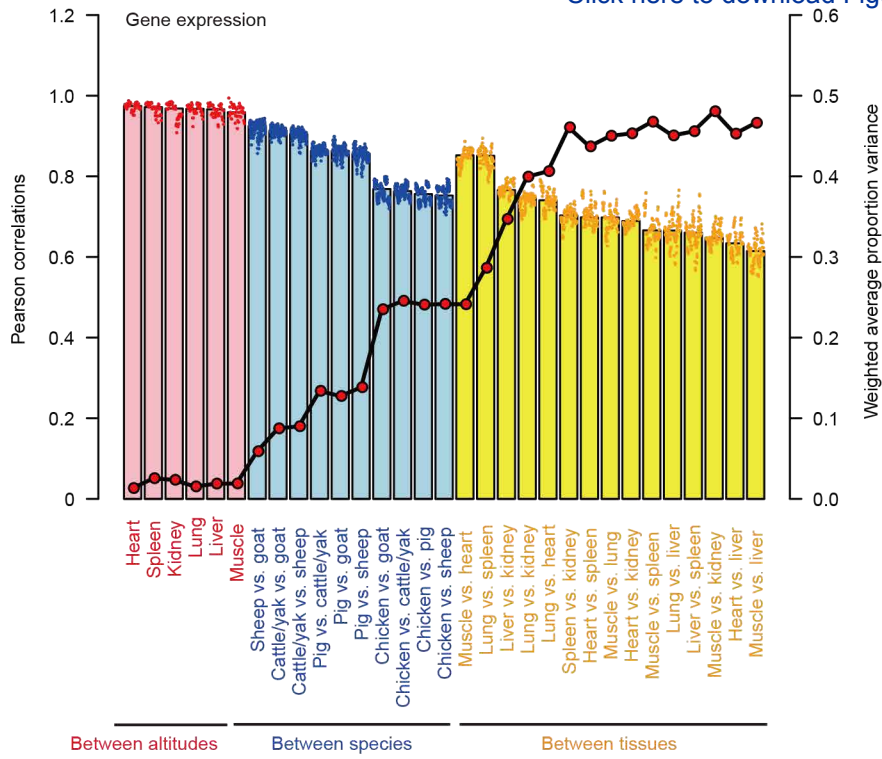

b

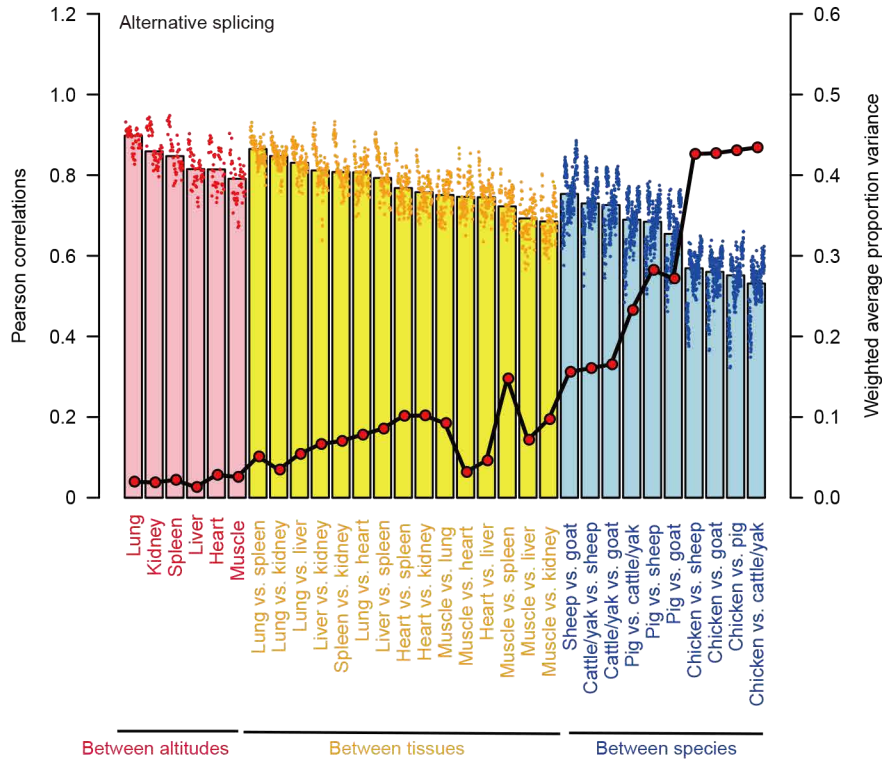

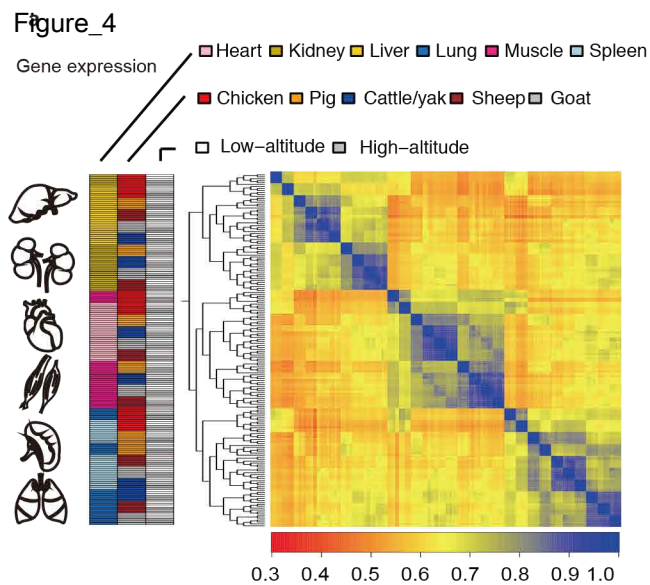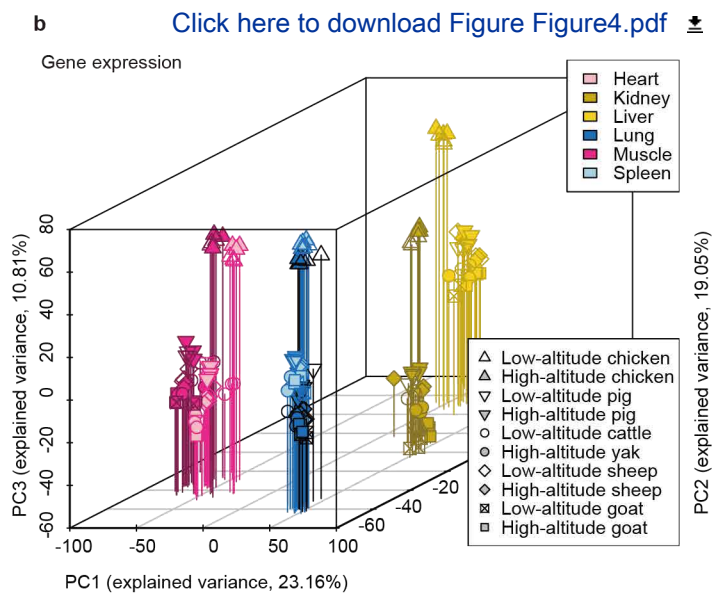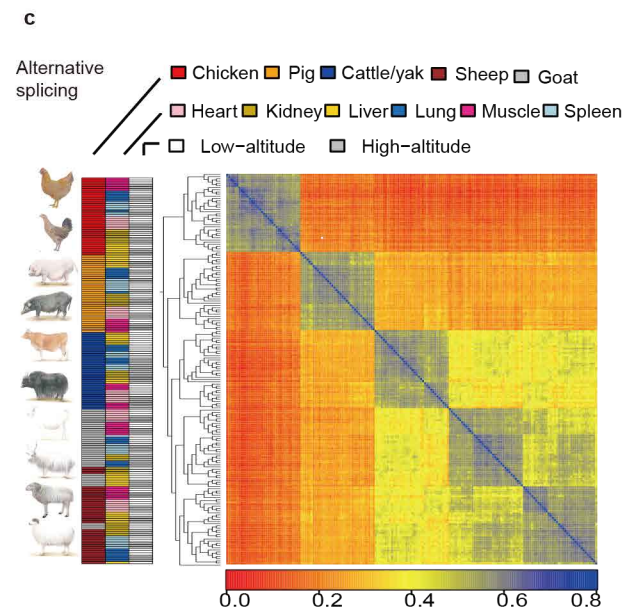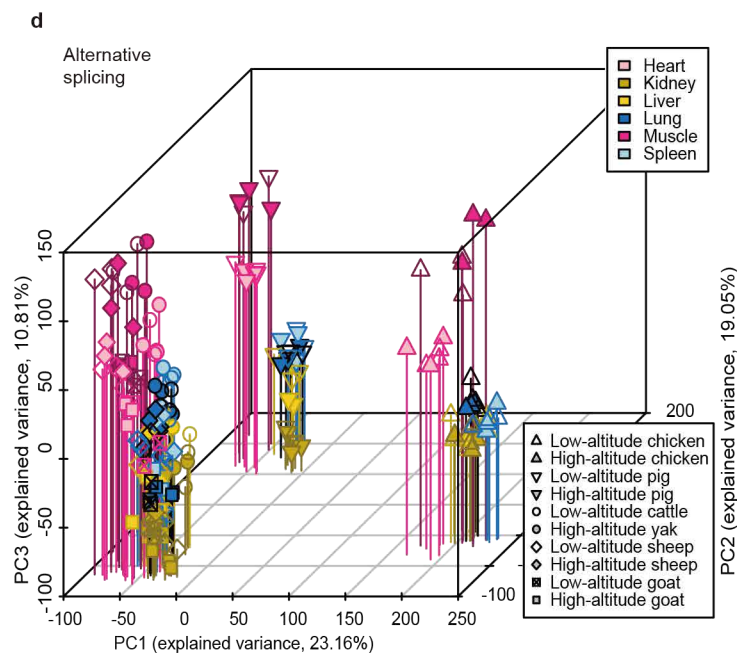



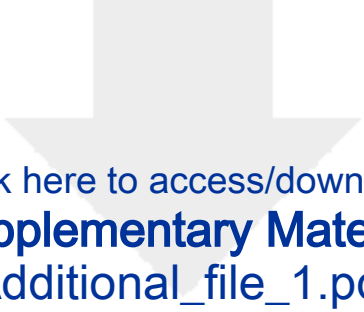

Click here to access/download  
**Supplementary Material**  
Additional\_file\_1.pdf



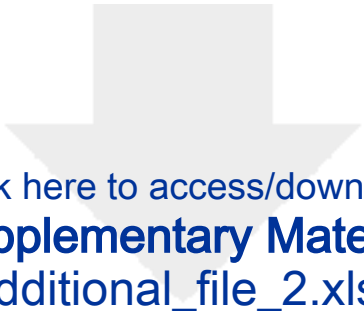

Click here to access/download  
**Supplementary Material**  
Additional\_file\_2.xlsx



Dear Editor,

We are pleased to submit our manuscript entitled '**Comparative transcriptomics of five high-altitude vertebrates and their low-altitude relatives**' for consideration of publication in *GigaScience* as a *Data Note*.

A major objective of evolutionary genetics is to provide a mechanistic account of the genetic basis for inter- and intra-species phenotypic variation. Although the relative contribution of changes in gene regulation to adaptation continues to be debated, it has become clear that variation in gene expression patterns often plays a key part in the evolution of morphological phenotypes. The current challenge is to understand what extent the environment affects gene expression phenotypes and whether it would be possible to detect genetic contributions to variation in gene regulation within or between species.

High-altitude livings undergo strong selective pressures by the extremely inhospitable environments, making these attractive species valuable resources for comparatively investigating the adaptive evolution. To fully characterize the transcriptomic differences between distinct species in adaptation or acclimatization to high-altitude environments, so as to further comprehensively investigate evolutionary changes in different regulatory genetic mechanisms. We generated a total of ~909.6 Gb high-quality RNA-seq data using Illumina sequencing technology from 180 samples derived from six biologically representative tissues (heart, kidney, liver, lung, skeletal muscle and spleen) of three unrelated adult females for each of five agriculturally important high-altitude vertebrates (Tibetan chicken, Tibetan pig, Tibetan sheep, Tibetan goat and yak), and their cross-fertile relatives lived in the geographically neighboring low-altitude regions. Comparative transcriptomics analysis preliminarily reveals the distinctly transcriptomic characteristics between gene expression and alternative splicing. We also identified numerous differentially expressed genes were potentially involved in phenotypic divergence shaped by high-altitude adaptation.

We believe the particularly valuable RNA-seq dataset described by this manuscript will be of interest and potentially be useful to a broad range of *GigaScience* readers as it pertains to two important research areas (i.e., gene regulation and adaptive evolution) as well as the agri-food industry.

This manuscript includes 4 figures comprising 14 separate panels in total, and a table, and 8 Supplemental Figures and 3 Supplemental Tables. The manuscript has been seen and approved by all listed authors.

We hope the Editorial Board will find this study worthy of review and consideration for publication in *GigaScience as a Data Note*.

With best regards,

Dr. Mingzhou Li

Professor of Animal Genetics and Genomics

Sichuan Agricultural University, Sichuan, China

E-mail: [mingzhou.li@sicau.edu.cn](mailto:mingzhou.li@sicau.edu.cn)

**Suggested Reviewers:**

1. Prof. Marc Kirschner

Email: [marc@hms.harvard.edu](mailto:marc@hms.harvard.edu)

Department of Systems Biology,

Harvard Medical School, USA.

Research area: Systems biology, Transcriptomics

2. Prof. Menghua Li

Email: [menghua.li@ioz.ac.cn](mailto:menghua.li@ioz.ac.cn)

CAS Key Laboratory of Animal Ecology and Conservation Biology,  
Institute of Zoology,  
Chinese Academy of Sciences (CAS), China  
Research area: Ecological and evolutionary genomics

3. Prof. Sudhir Kumar

Email: [s.kumar@temple.edu](mailto:s.kumar@temple.edu)

Department of Biology,  
Institute for Genomics and Evolutionary Medicine,  
Temple University, USA.

Research area: Phylogenomics and phylomedicine

**Excluded reviewers:**

1. Prof. Martien A. M. Groenen

Email: [martien.groenen@wur.nl](mailto:martien.groenen@wur.nl)

Animal Breeding and Genomics Centre,  
Wageningen University, The Netherlands.

2. Prof. Yaping Zhang

Email: [zhangyp@mail.kiz.ac.cn](mailto:zhangyp@mail.kiz.ac.cn)

Kunming Institute of Zoology,  
Chinese Academy of Sciences, China.
